# Supplementary material
Source: publisher site journal article supplement (https://www.spandidos-publications.com/2044/downloadSupplementary)

Figure S1. Invasive abilities of U87 and U251 cell lines transfected with the miR-138-5p mimic or miR-NC were analyzed using a Transwell assay. Magnification, x4. \* $P < 0.05$  vs. miR-NC. An unpaired Student's t-test was used to analyze the data. miR, microRNA; NC, negative control.

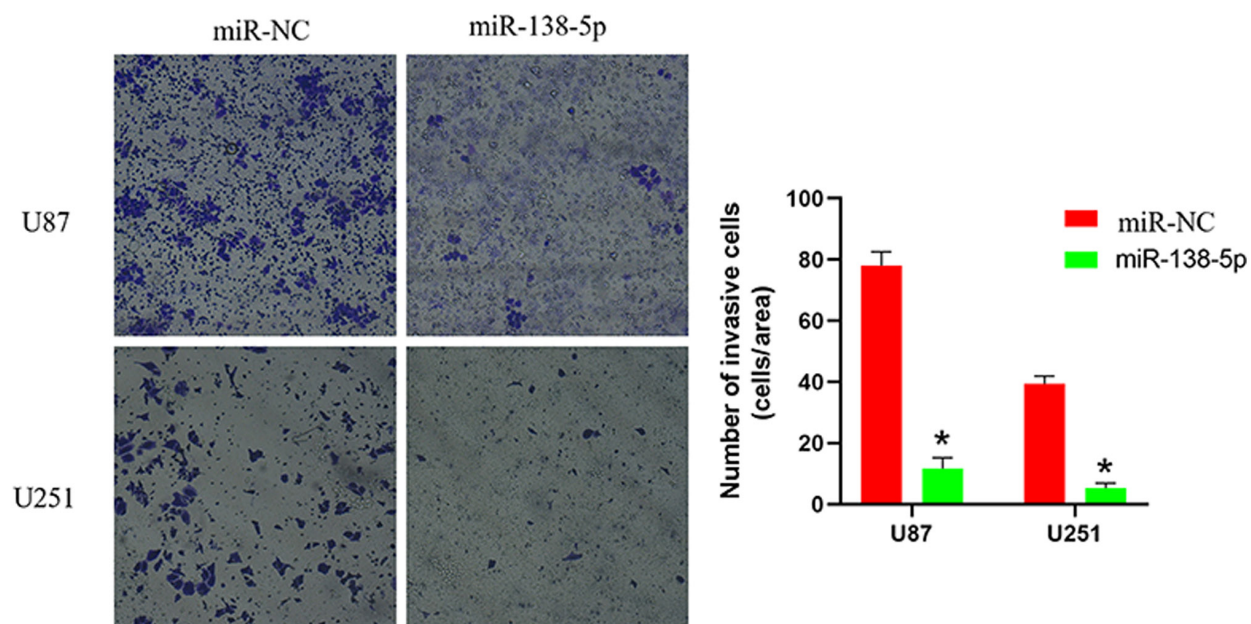

Supplement: Supplementary file 1 [file downloadSupplementary]
